# Supplementary material for: Systemic exosomal siRNA delivery reduced alpha-synuclein aggregates in brains of transgenic mice
Source: PubMed Central journal article supplement (PMC4204174; doi:10.1002/mds.25978), 2014-08-11

**a**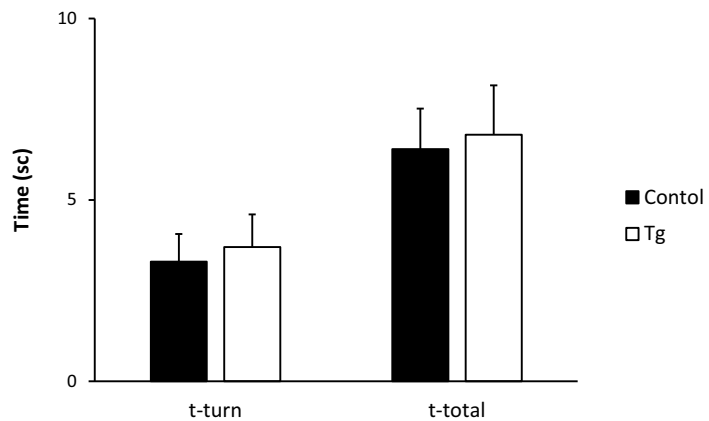**b**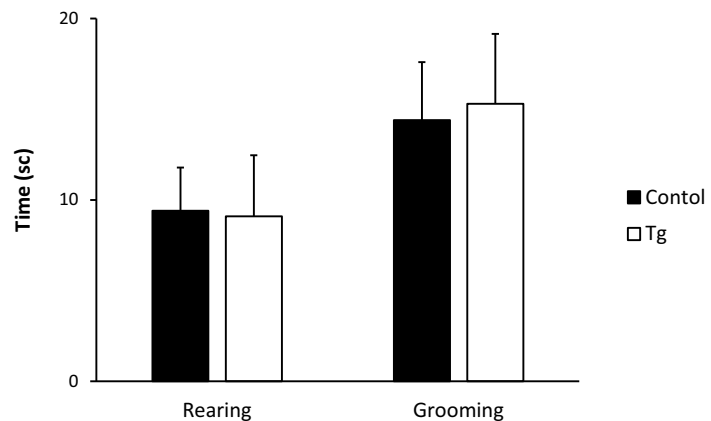**c**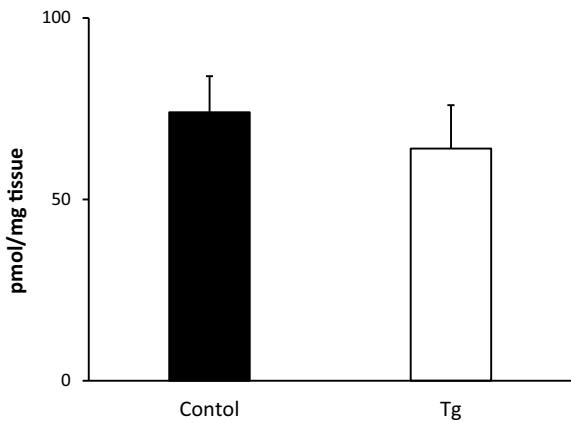

Supplement: NIHMS60085-supplement-Suppl_Fig_3.pdf [file NIHMS60085-supplement-Suppl_Fig_3.pdf]
