# Supplementary material for: Systemic exosomal siRNA delivery reduced alpha-synuclein aggregates in brains of transgenic mice
Source: PubMed Central journal article supplement (PMC4204174; doi:10.1002/mds.25978), 2014-08-11

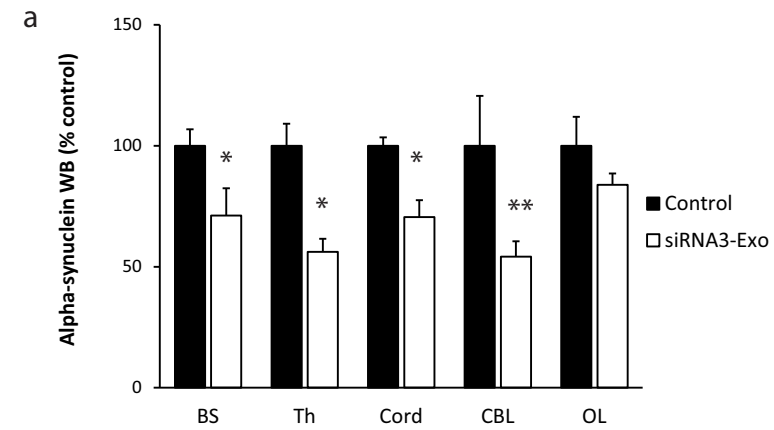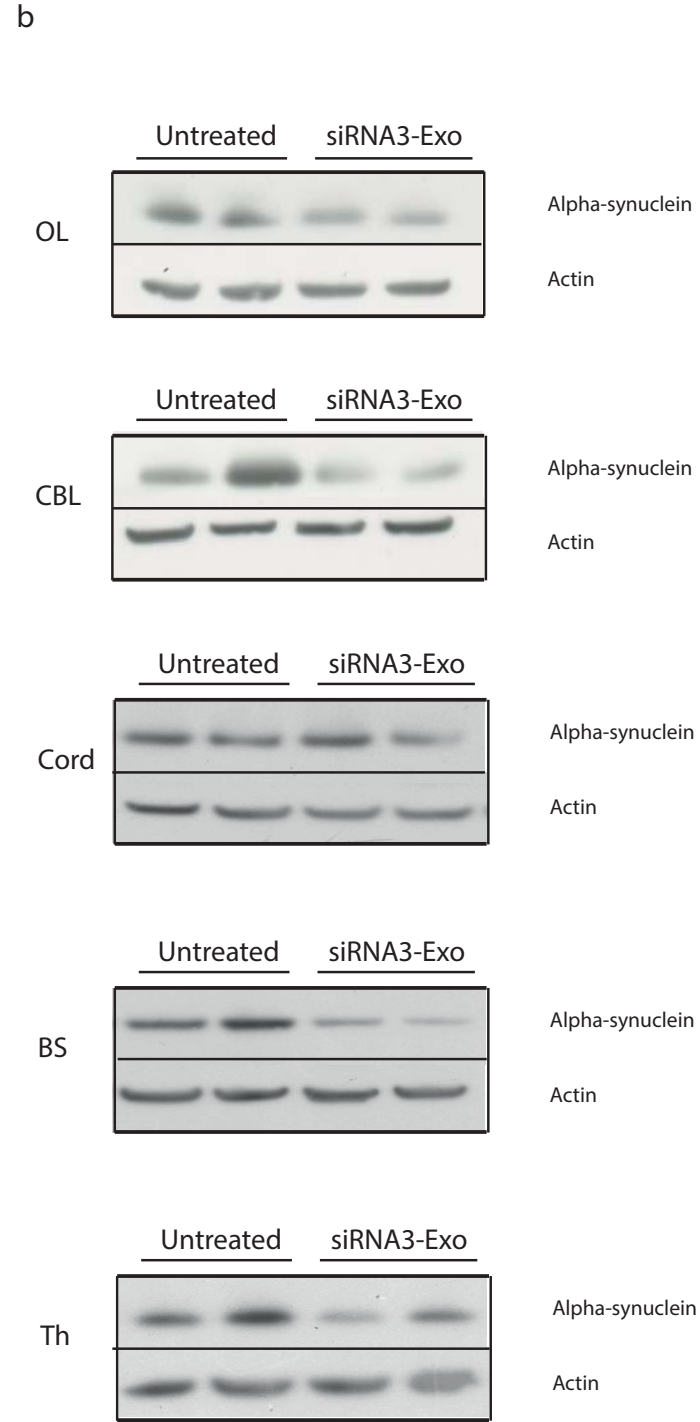

Supplement: NIHMS60085-supplement-Suppl_Fig_4.pdf [file NIHMS60085-supplement-Suppl_Fig_4.pdf]
